# Supplementary material
Source: PubMed Central journal article supplement (PMC4466038)

## Supplement 1

Figure S1: Effect of VU0364770 on forelimb use, motor performance. In the cylinder test, L-DOPA alone or in combination with VU0364770 improved the rat's use of the affected paw (6A: One-way ANOVA:  $F=8.45$ ,  $p=0.0002$ ). Rats treated with L-DOPA 10 mg/kg with or without VU0364770 had up to 40% improved performance on the rotarod (6B: One-way ANOVA:  $F=4.18$ ,  $p=0.0124$ ). There was a trend that VU0364770 alone induced a motor improvement, however it was not statistically significant.).  $P<0.05$  \*vs. Saline, Student Newman Keul's post hoc test.

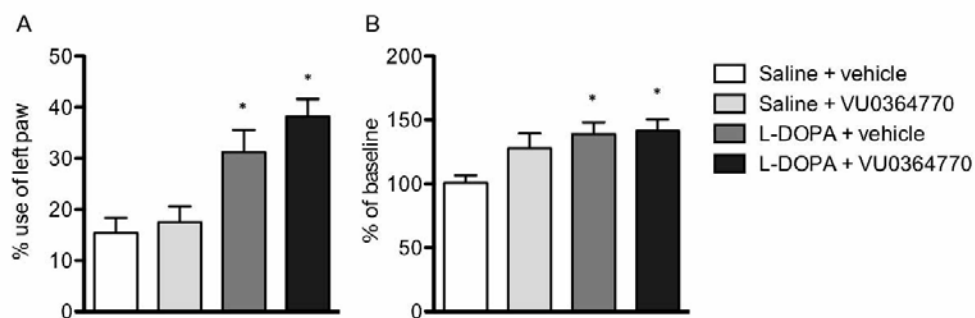

Supplement: NIHMS677756-supplement-Supplemental.pdf [file NIHMS677756-supplement-Supplemental.pdf]
